# Supplementary material
Source: PubMed Central journal article supplement (PMC7060979)
Supplement: NIHMS1533422-supplement-SuppMaterial.pdf [file NIHMS1533422-supplement-SuppMaterial.pdf]

## Supplementary material

We obtain the functional connectivity fluctuation across each pair of nodes using tdFC and sdFC graphs. The mean and standard deviation across the HC and the SZ group using the tdFC graphs from GICA result are shown in Figure 1. The mean and standard deviation across the HC and the SZ group using the tdFC graphs from pt-cIVA are shown in Figure 2. The mean and standard deviation across the HC and the SZ group using the sdFC graphs from pt-cIVA are shown in Figure 3.

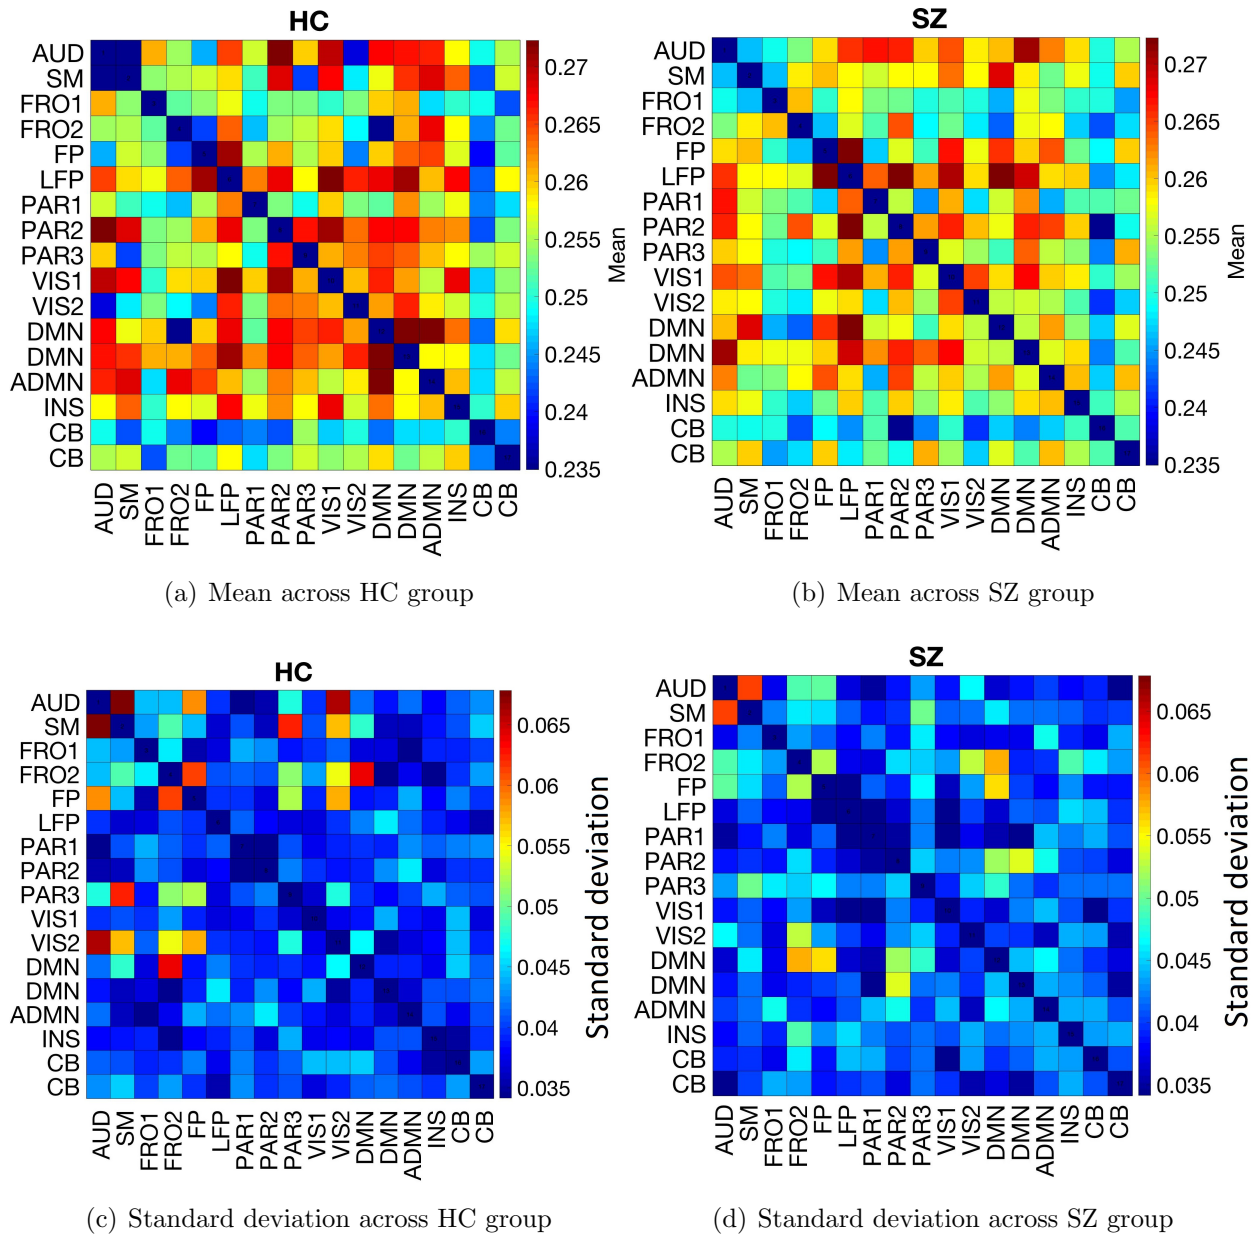

Figure 1: The mean across the HC (a) and the SZ group (b) using the tdFC graphs from GICA. The standard deviation across the HC (c) and the SZ group (d) using the tdFC graphs from GICA.

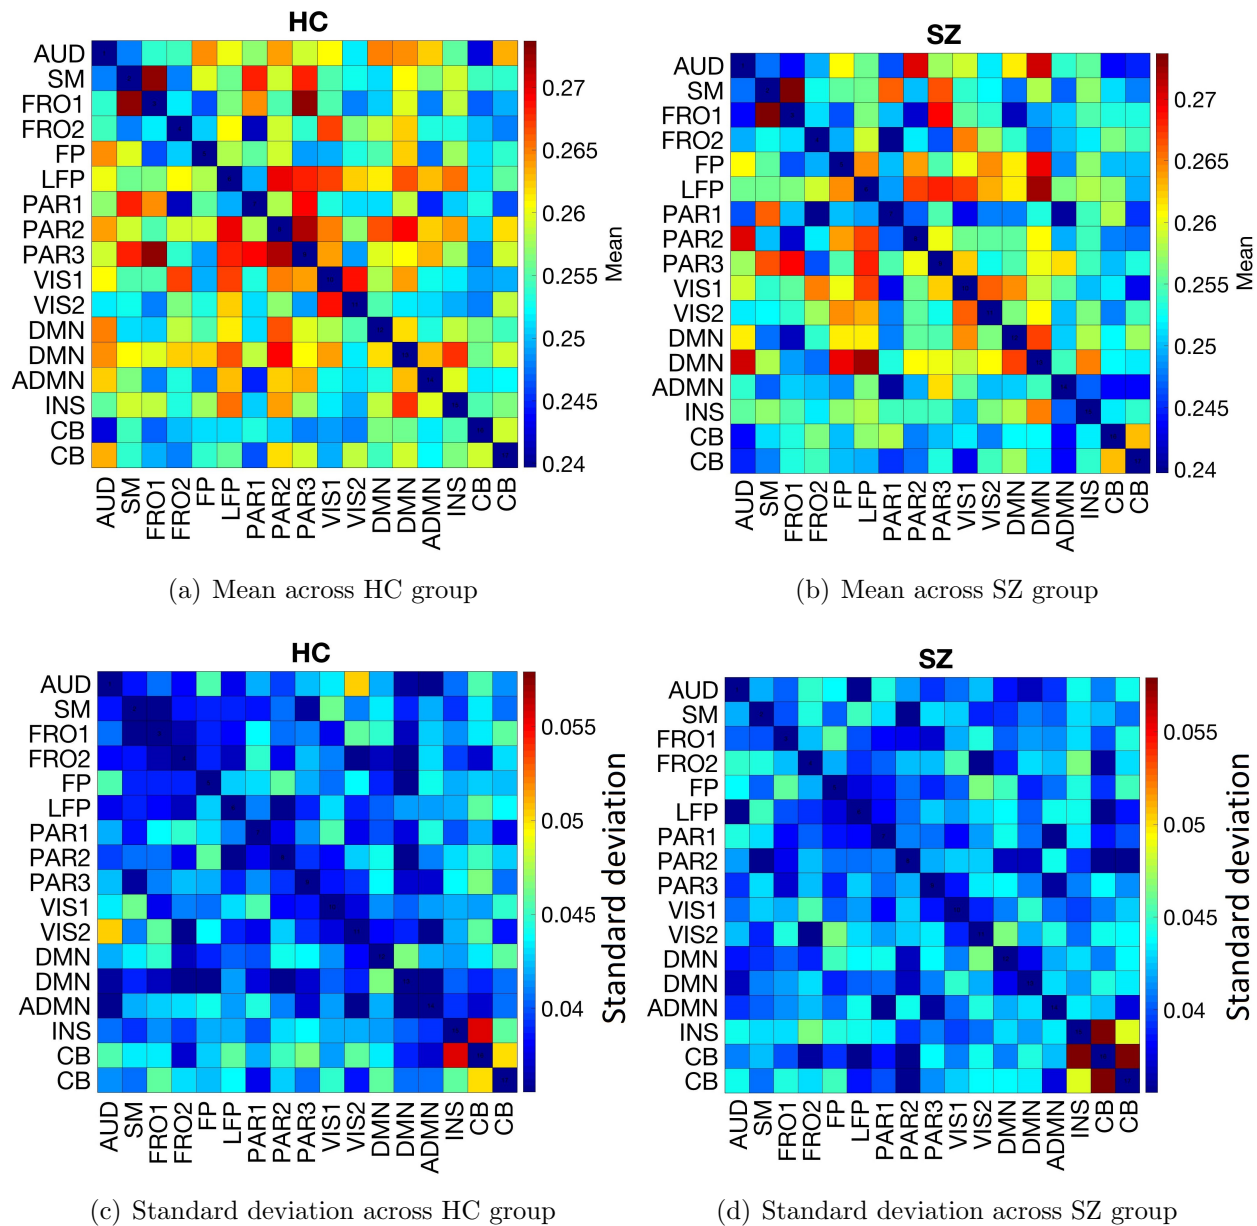

Figure 2: The mean across the HC (a) and the SZ group (b) using the tdFC graphs from pt-cIVA. The standard deviation across the HC (c) and the SZ group (d) using the tdFC graphs from pt-cIVA.

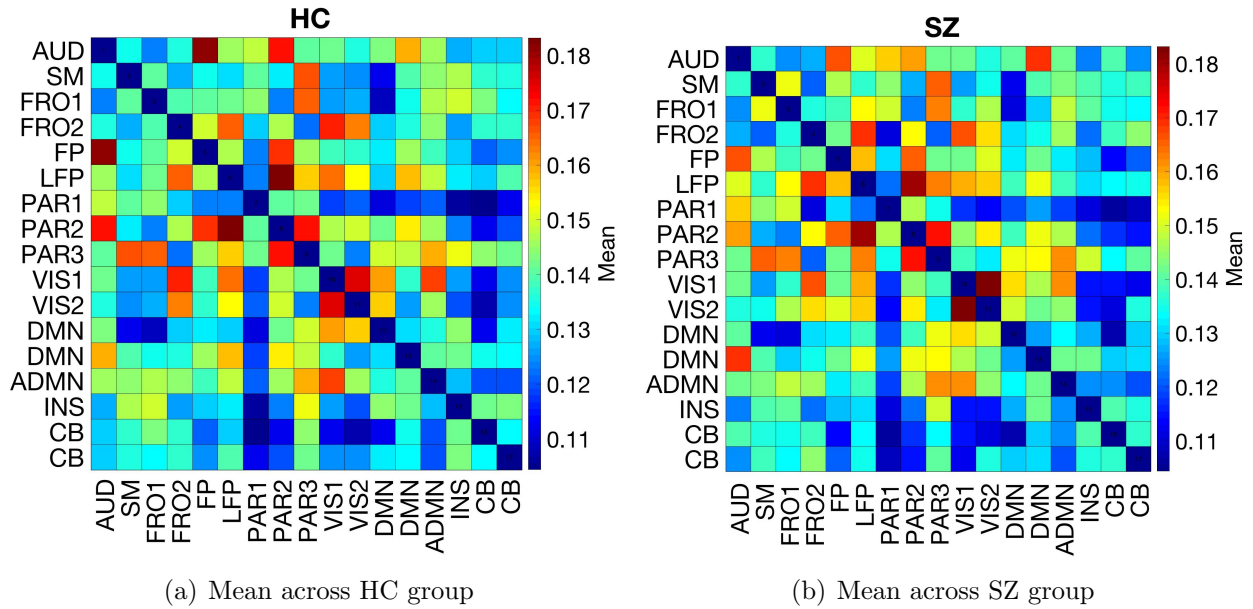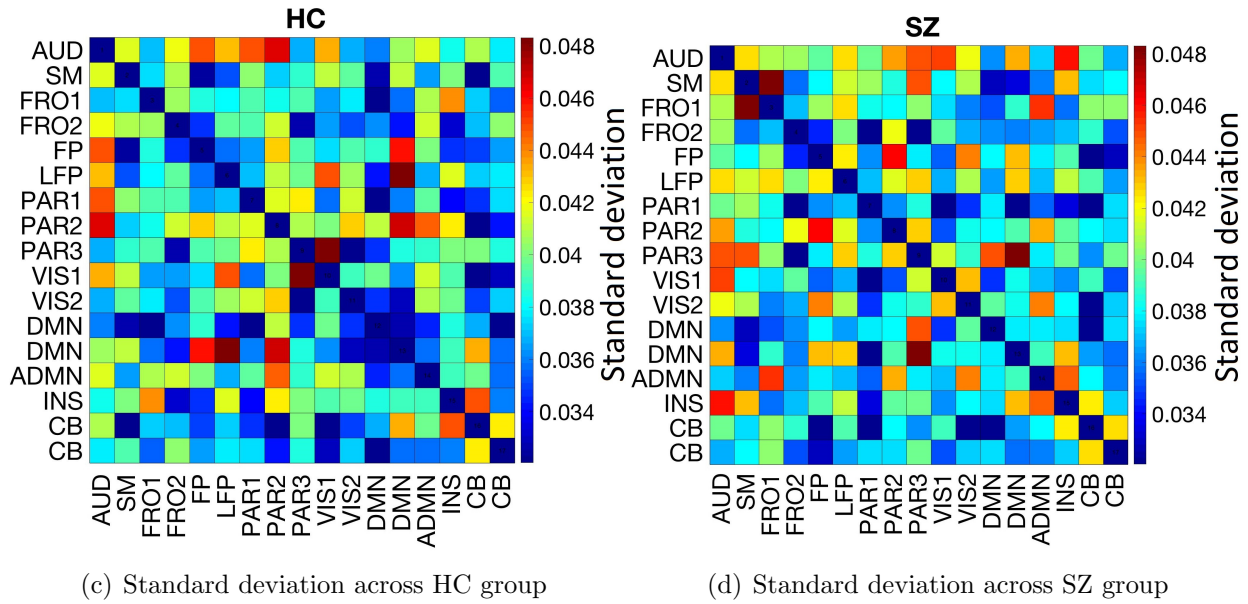

Figure 3: The mean across the HC (a) and the SZ group (b) using the sdFC graphs from pt-cIVA. The standard deviation across the HC (c) and the SZ group (d) using the sdFC graphs from pt-cIVA.
